# Supplementary material for: Novel Genetic Risk Variants and Clinical Predictors Associated With Primary Sclerosing Cholangitis in Patients With Ulcerative Colitis
Source: PubMed Central journal article supplement — Clin Transl Gastroenterol. 2023 Jul 14;14(9):e00615. doi: 10.14309/ctg.0000000000000615 (PMC10522100; doi:10.14309/ctg.0000000000000615), 2023-07-14
Supplement: ct9-14-e00615-s001.pdf [file ct9-14-e00615-s001.pdf]

**Supplemental Table 1.** Multivariate Regression Analysis of Clinical Predictors With and Without the Genetic Factor to Predict PSC risk in UC

| Clinical/demographic predictors             | unadjusted<br>OR (95% CI)              | Adjusted<br>OR (95% CI) *              | Adjusted<br>OR (95% CI)#            |
|---------------------------------------------|----------------------------------------|----------------------------------------|-------------------------------------|
| Age at diagnosis:<br><20 y/o (Yes)          | 3.83 (2.14-6.85)<br><i>P</i> =1.51E-05 | 2.22 (1.16-4.25)<br><i>P</i> =.02      | 1.67 (0.82-3.41)<br><i>P</i> =.16   |
| Disease duration (year) (S.D.)              | <i>P</i> =1.76E-11                     | <i>P</i> =4.42E-09                     | <i>P</i> =1.48E-06                  |
| Ever smoke (Yes)                            | 0.38 (0.18 -0.82)<br><i>P</i> =.007    | 0.42 (0.19 -0.96)<br><i>P</i> =.02     | 0.40 (0.16-0.98)<br><i>P</i> =.03   |
| Extensive (pan-colitis) (Yes)               | 5.97 (2.12-16.7)<br><i>P</i> =1.92E-05 | 5.42 (1.87-15.7)<br><i>P</i> =1.57E-04 | 4.27 (1.40-13.0)<br><i>P</i> =.003  |
| <b>rs3131621 (G/A)</b><br>chr06: 31,457,722 | 2.77 (1.86-4.14)<br><i>P</i> =1.75E-07 | --                                     | 2.00 (1.26-3.18)<br><i>P</i> =.002  |
| <b>rs9275596 (C/T)</b><br>chr06: 32,713,854 | 3.24 (2.15-4.89)<br><i>P</i> =2.70E-09 | --                                     | 2.17 (1.35-3.49)<br><i>P</i> =.001  |
| <b>rs11244 (A/G)</b><br>chr06: 32,812,947   | 3.15 (2.11-4.71)<br><i>P</i> =2.48E-09 | --                                     | 2.29 (1.42-3.68)<br><i>P</i> =.0005 |

\*Multivariate model: age at diagnosis, disease duration, ever smoking, extensive UC

#Multivariate model: age at diagnosis, disease duration, ever smoking, extensive UC,  
rs3131621, rs9275596, rs11244.
